# Supplementary material for: Population Genetic Structure and Demography of the Critically Endangered Chequered Blue Butterfly (Scolitantides orion) in a Highly Isolated Part of Its Distribution Range
Source: Insects. 2020 Sep 8;11(9):608. doi: 10.3390/insects11090608 (PMC7564389; doi:10.3390/insects11090608)
Supplement: Supplementary file 1 [file insects-11-00608-s001.zip › Table_S1.pdf]

**Table S1.** Frequencies of 12 haplotypes of the 579 bp COI mitochondrial gene identified in two populations of the chequered blue butterfly (*Scolitantides orion*) from Poland (2 haplotypes: H1, H2) and deposited in the GenBank database (11 haplotypes: H1, H3-H12).

| Population<br>Haplotype | P1<br>(N=34) | P2<br>(N=30) | ES<br>(N=9) | DE<br>(N=2) | CH<br>(N=1) | NO<br>(N=3) | FI<br>(N=1) | RO<br>(N=7) | AL<br>(N=1) | RU<br>(N=1) | KZ<br>(N=2) | KR<br>(N=1) | CN<br>(N=1) |
|-------------------------|--------------|--------------|-------------|-------------|-------------|-------------|-------------|-------------|-------------|-------------|-------------|-------------|-------------|
| H1                      | 0.91         | 1.00         | 0.00        | 0.00        | 0.00        | 0.00        | 1.00        | 0.00        | 0.00        | 0.00        | 0.00        | 0.00        | 0.00        |
| H2                      | 0.09         | 0.00         | 0.00        | 0.00        | 0.00        | 0.00        | 0.00        | 0.00        | 0.00        | 0.00        | 0.00        | 0.00        | 0.00        |
| H3                      | 0.00         | 0.00         | 0.89        | 0.00        | 0.00        | 0.00        | 0.00        | 0.00        | 0.00        | 0.00        | 0.00        | 0.00        | 0.00        |
| H4                      | 0.00         | 0.00         | 0.11        | 0.00        | 0.00        | 0.00        | 0.00        | 0.00        | 0.00        | 0.00        | 0.00        | 0.00        | 0.00        |
| H5                      | 0.00         | 0.00         | 0.00        | 0.50        | 0.00        | 0.00        | 0.00        | 0.00        | 0.00        | 0.00        | 0.00        | 0.00        | 0.00        |
| H6                      | 0.00         | 0.00         | 0.00        | 0.50        | 1.00        | 0.00        | 0.00        | 1.00        | 0.00        | 0.00        | 0.00        | 0.00        | 0.00        |
| H7                      | 0.00         | 0.00         | 0.00        | 0.00        | 0.00        | 1.00        | 0.00        | 0.00        | 0.00        | 0.00        | 0.00        | 0.00        | 0.00        |
| H8                      | 0.00         | 0.00         | 0.00        | 0.00        | 0.00        | 0.00        | 0.00        | 0.00        | 1.00        | 0.00        | 0.00        | 0.00        | 0.00        |
| H9                      | 0.00         | 0.00         | 0.00        | 0.00        | 0.00        | 0.00        | 0.00        | 0.00        | 0.00        | 1.00        | 0.50        | 0.00        | 0.00        |
| H10                     | 0.00         | 0.00         | 0.00        | 0.00        | 0.00        | 0.00        | 0.00        | 0.00        | 0.00        | 0.00        | 0.50        | 0.00        | 0.00        |
| H11                     | 0.00         | 0.00         | 0.00        | 0.00        | 0.00        | 0.00        | 0.00        | 0.00        | 0.00        | 0.00        | 0.00        | 1.00        | 0.00        |
| H12                     | 0.00         | 0.00         | 0.00        | 0.00        | 0.00        | 0.00        | 0.00        | 0.00        | 0.00        | 0.00        | 0.00        | 0.00        | 1.00        |

Population symbols (numbers of sequences used from the GenBank database are given in brackets): P1 – Parchatka; P2 – Janowiec; AL – Albania (MH407225); CH – Switzerland (MK186780); CN – China (KT236388); DE – Germany (HM391781, KX044703); ES – Spain (KP870233, KP870366, KP870455, KP870623, KP870781, GU676740, HM901246, HM901388, HM901429); FI – Finland (KT782365); KR – Republic of Korea (GU372588); KZ – Kazakhstan (FJ664037, FJ664038); NO – Norway (KX048470, KX048509, KX048958); RO – Romania (HQ005195, HQ005197, HQ005198, HQ005199, HQ005200, HQ005201, KP870981); RU – Russian Federation (JF854417).
